# Supplementary material
Source: Springer Nature journal article supplement (https://www.springermedizin.de/resource/supplementary/12943_2009_551_MOESM8_ESM.pdf/9554952)

**A**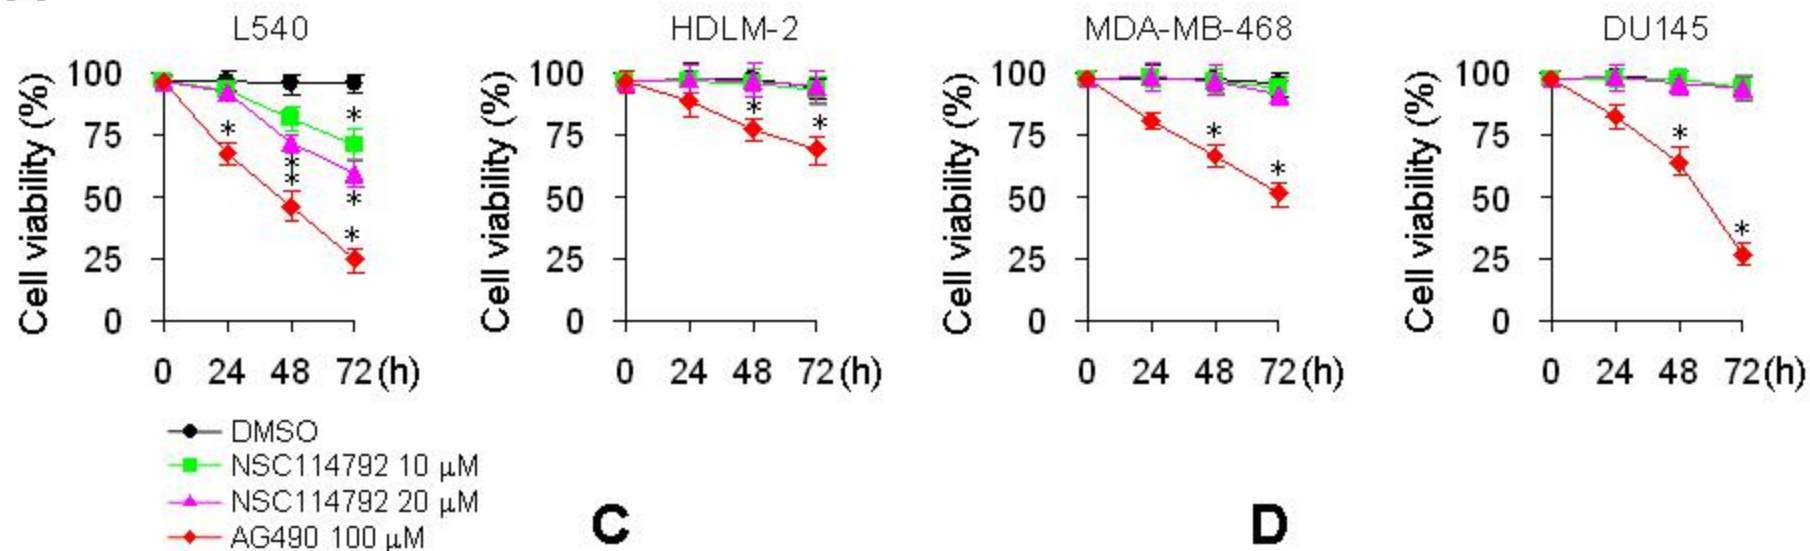**B**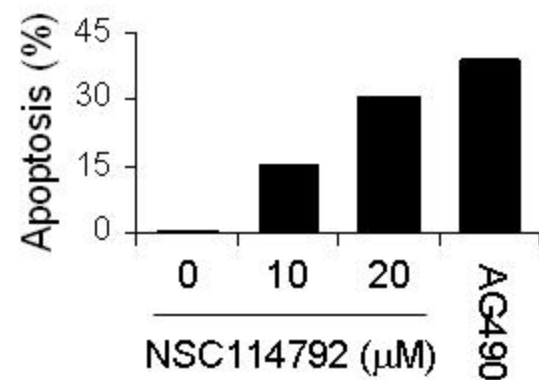**C**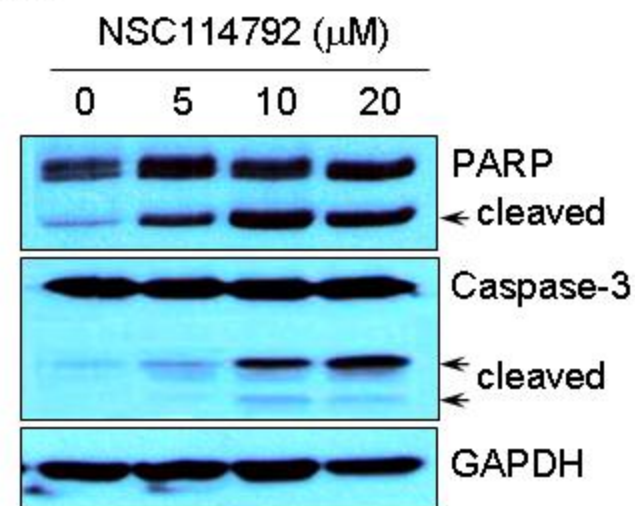**D**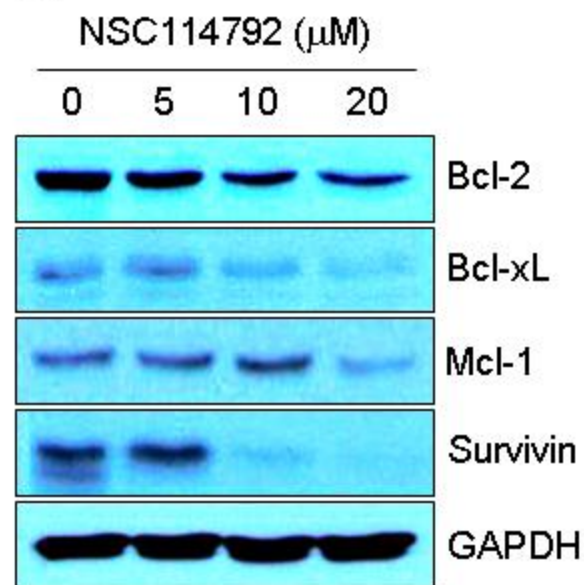

Supplement: MOESM8 [file 9554952]
